# Supplementary material
Source: Copernicus journal article supplement (doi:10.5194/egusphere-2026-3449)
Supplement: Supplementary file 1 [file egusphere-2026-3449-supplement.pdf]

Supplement of: QBO-induced anomalous transport in the  
Northern Hemisphere stratosphere: the exceptional  
2018/2019 late boreal winter

Daniele Minganti

June 12, 2026

# 1 Time series at 15 hPa

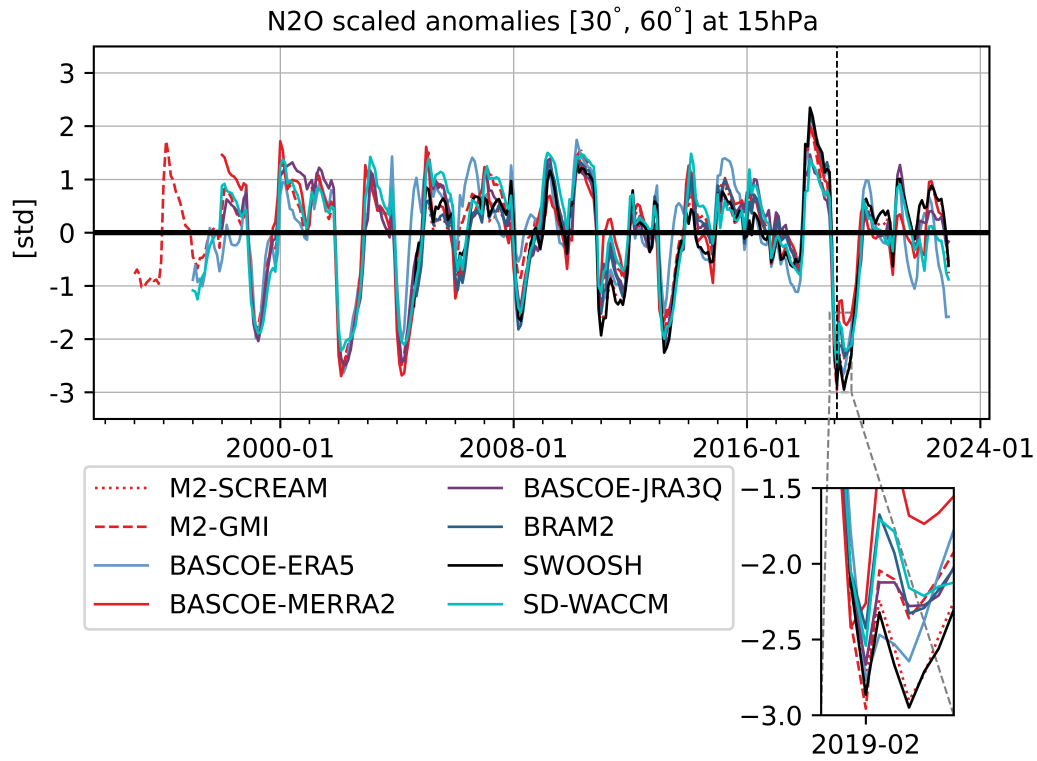

Figure S1: Same as Fig. 2, but at 15 hPa.

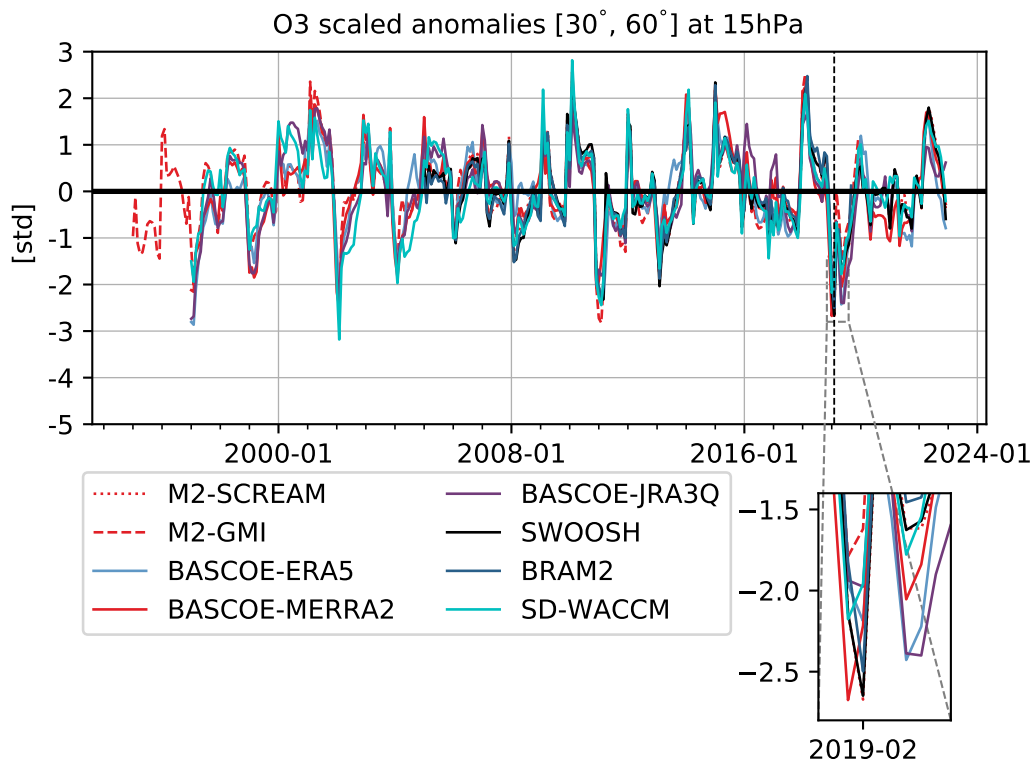

Figure S2: Same as Fig. 3, but at 15 hPa.

## 2 Time series of N2O TEM terms

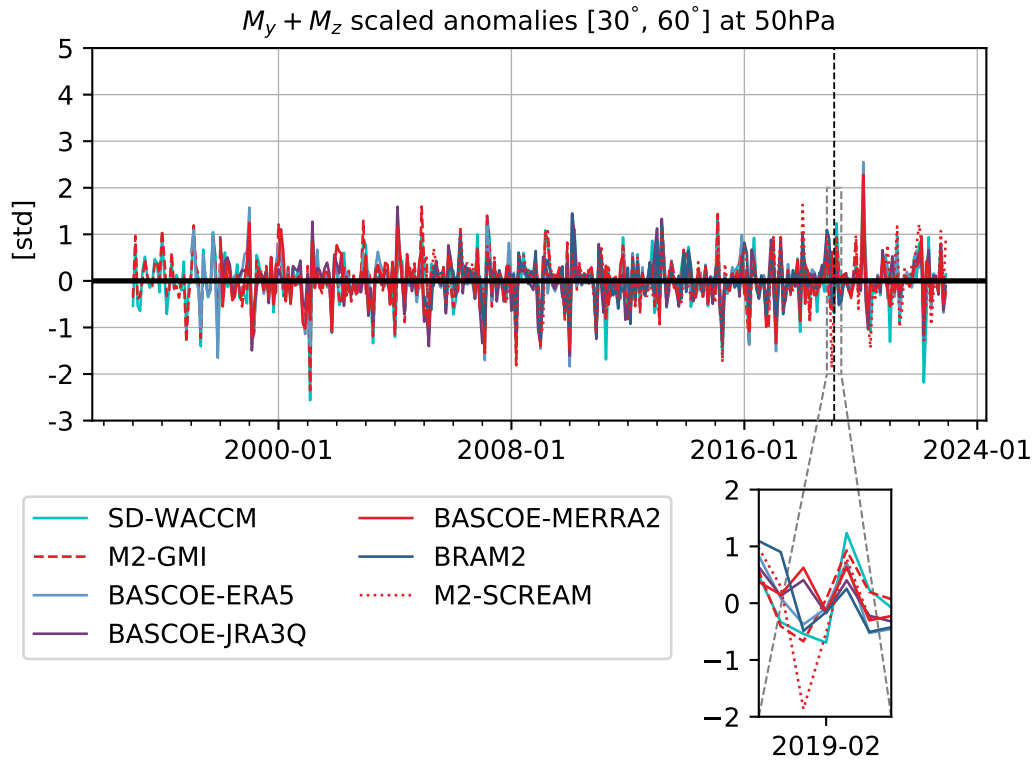

Figure S3: As Fig. 4, but for  $M_y + M_z$ .

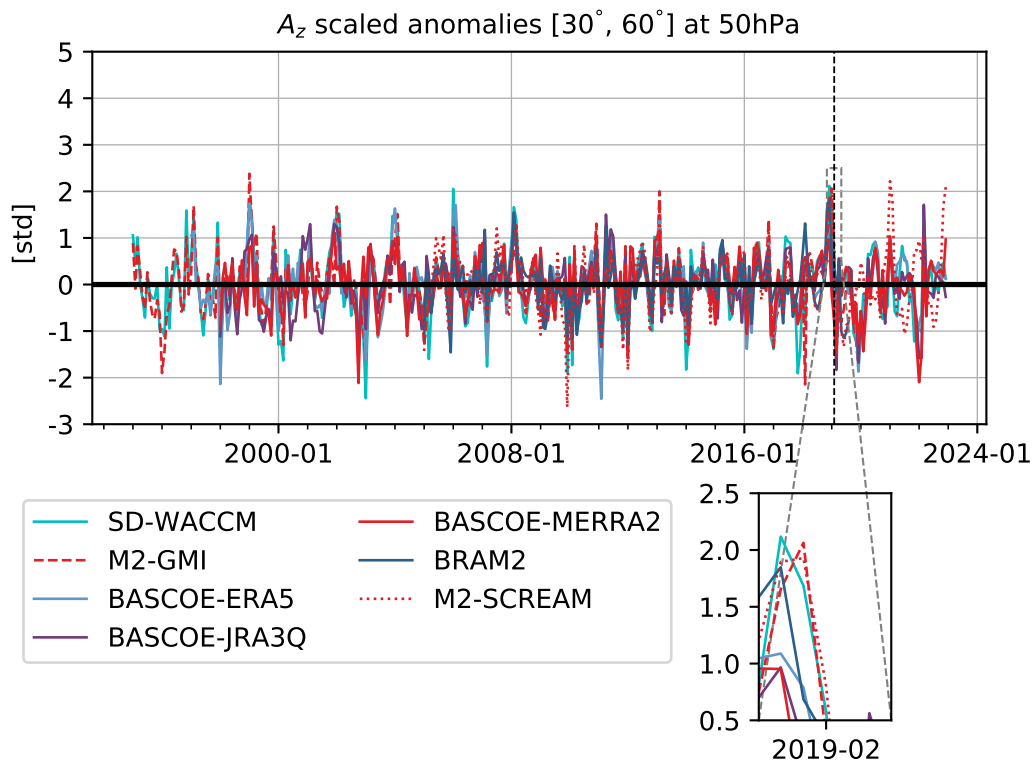

Figure S4: As Fig. 4, but for  $A_z$ .

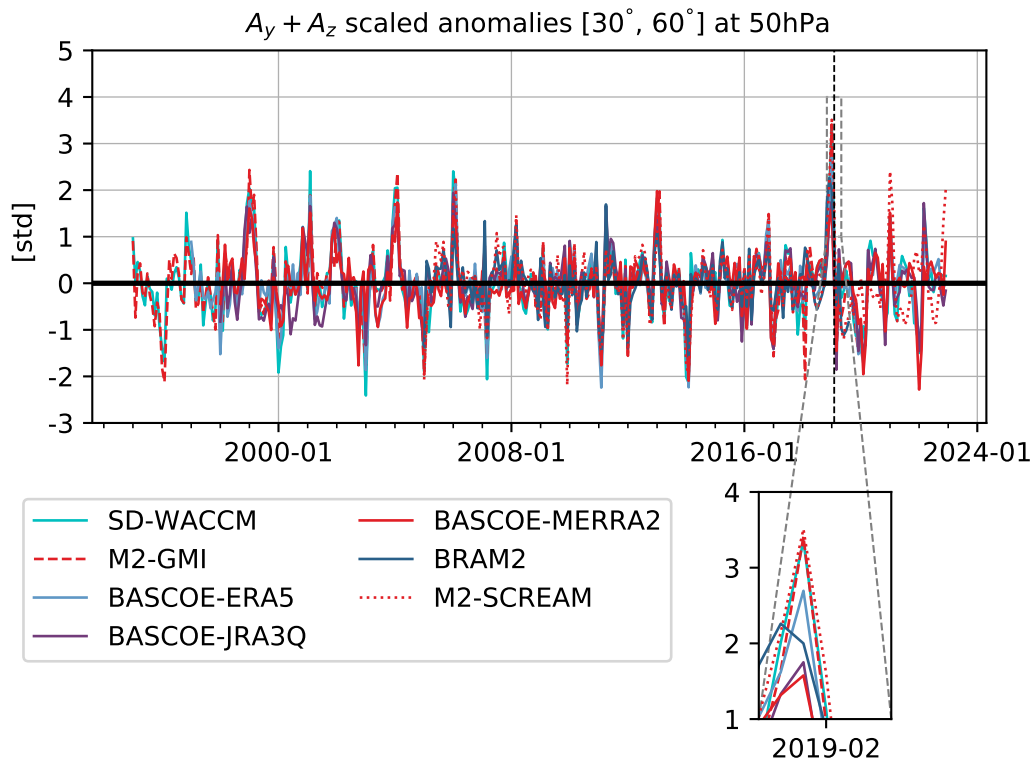

Figure S5: As Fig. 4, but for  $A_y + A_z$ .

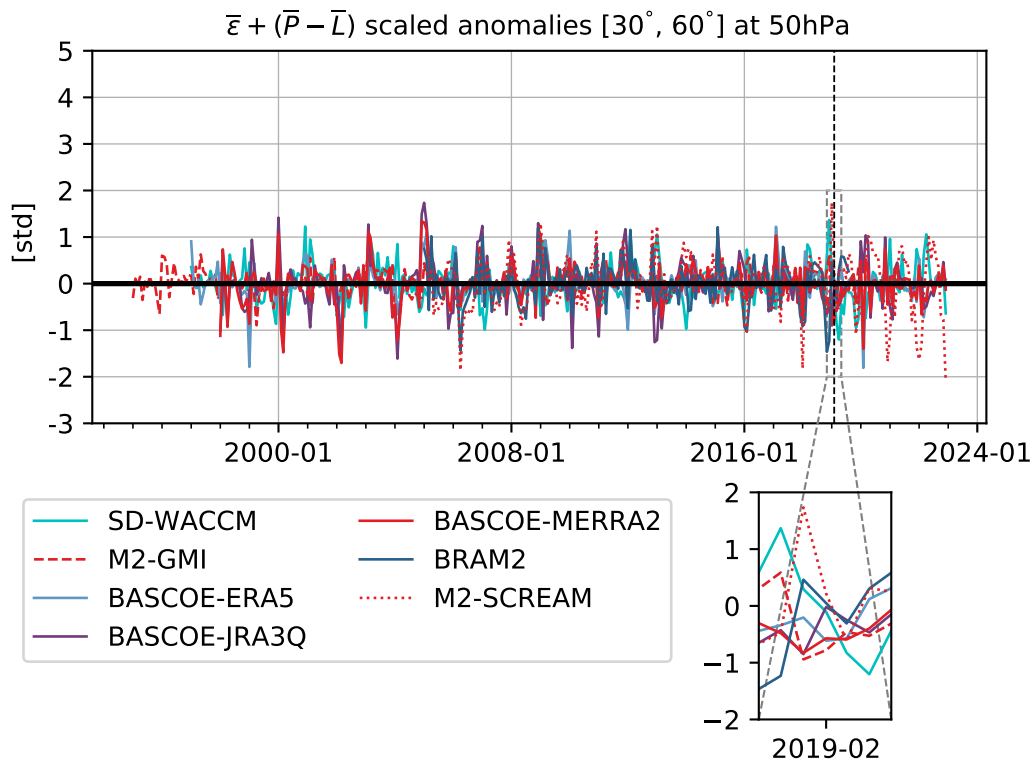

Figure S6: As Fig. 4, but for  $\epsilon + (P - L)$ .

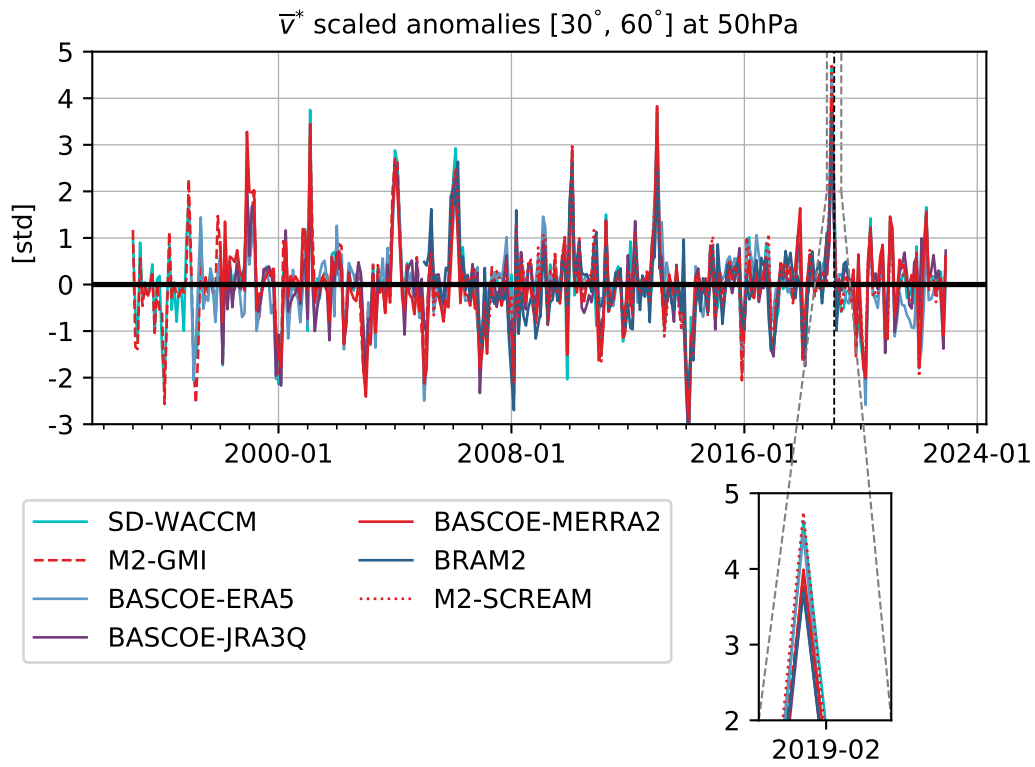

Figure S7: As Fig. 4, but for  $\bar{v}^*$ .

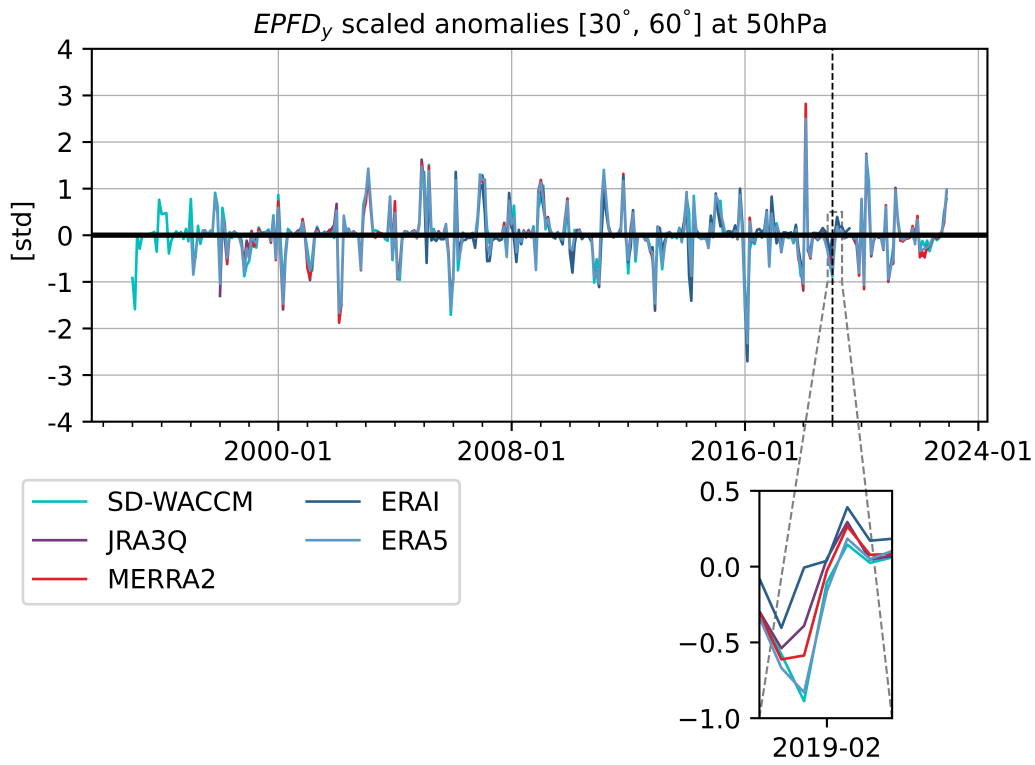

Figure S8: As Fig. 4, but for  $-EPFD_y$ .

### 3 Zonal wind

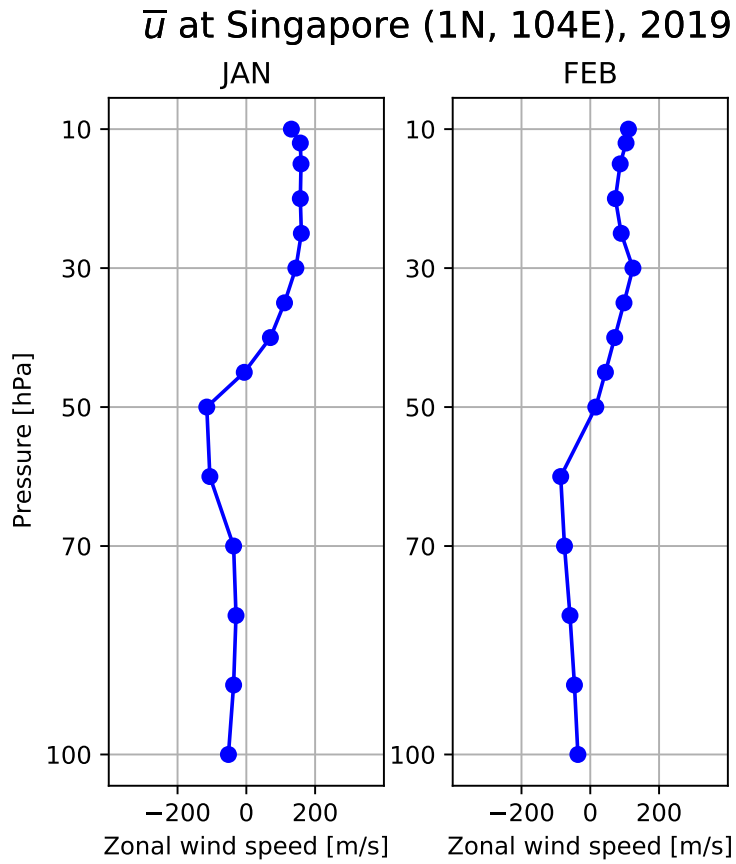

Figure S9: Vertical profiles of zonal wind speed [m/s] measured at Singapore for January 2019 (left) and February 2019 (right).

$\bar{u}$  at Singapore (1N, 104E), 2021

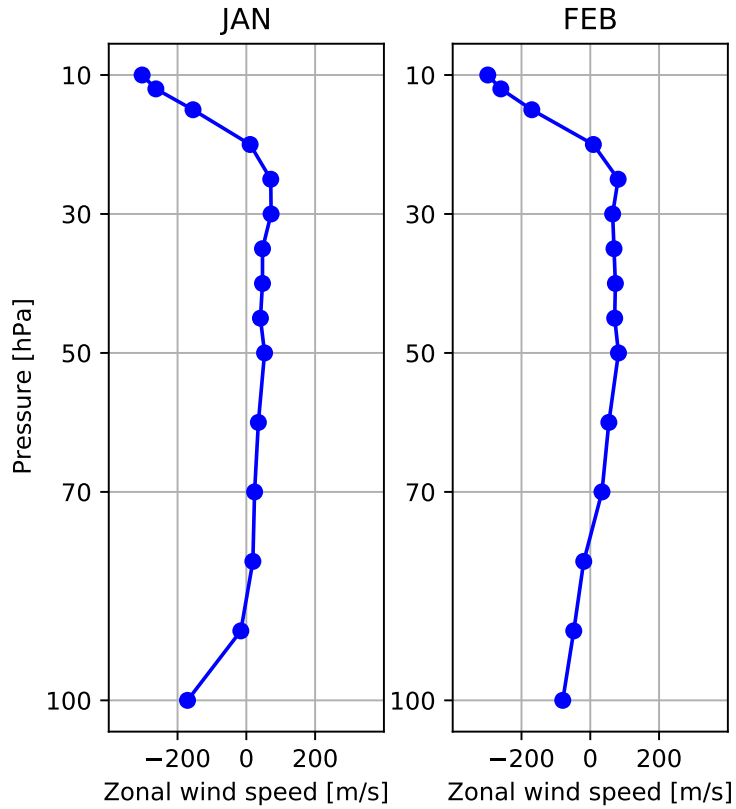

Figure S10: Vertical profiles of zonal wind speed [m/s] measured at Singapore for January 2021 (left) and February 2021 (right).

## 4 N<sub>2</sub>O anomalies in previous Februaries

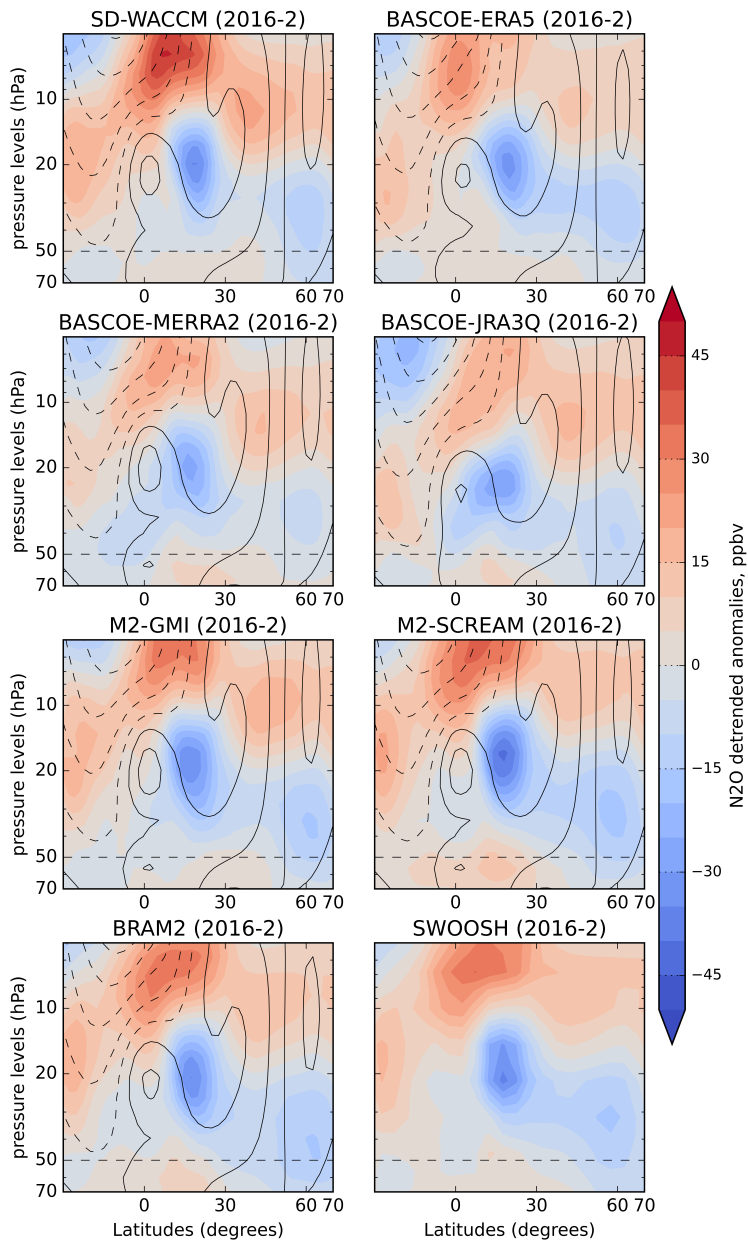

Figure S11: As Fig. 6, but for February 2016

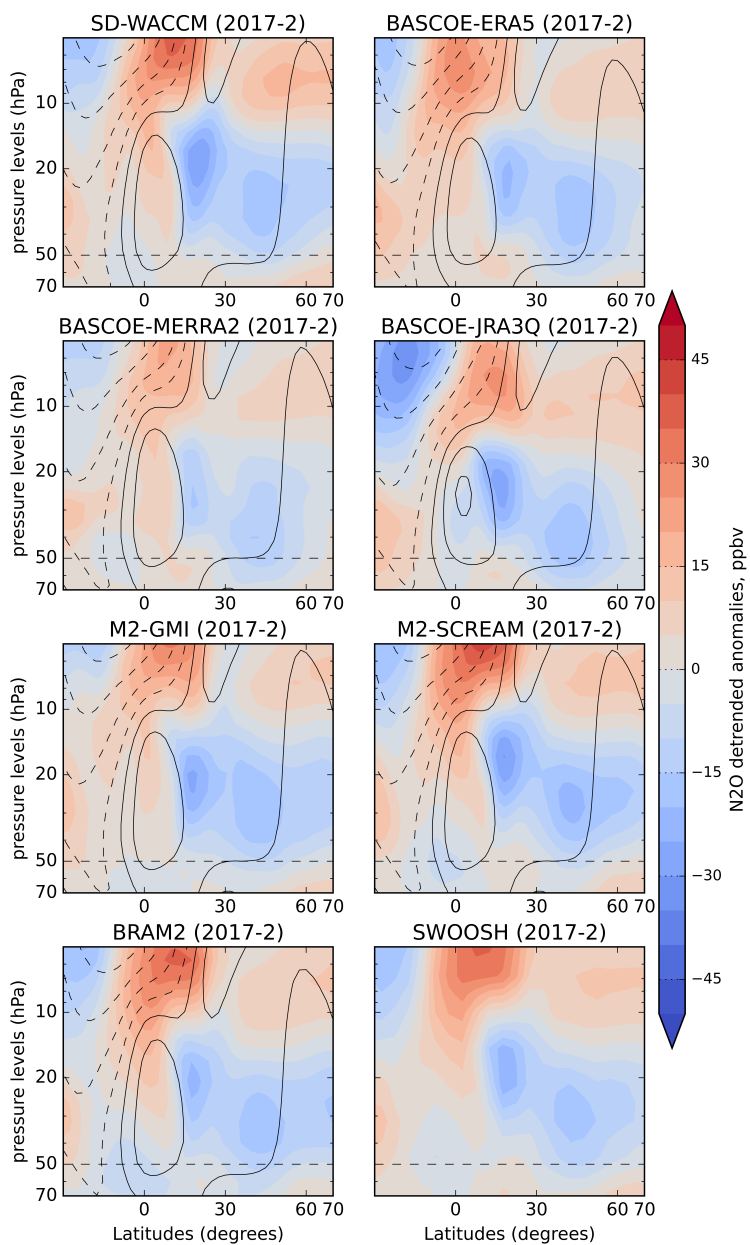

Figure S12: As Fig. 6, but for February 2017

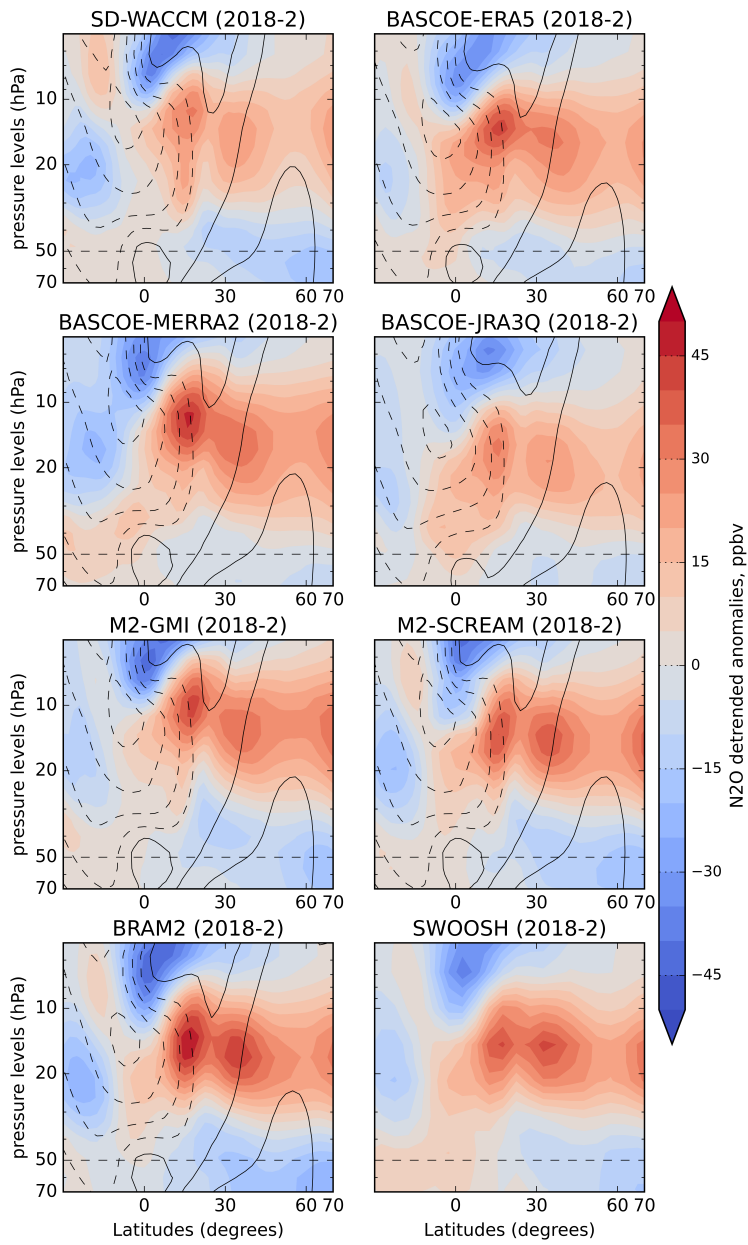

Figure S13: As Fig. 6, but for February 2018

## 5 N<sub>2</sub>O anomalies in W-QBO phase

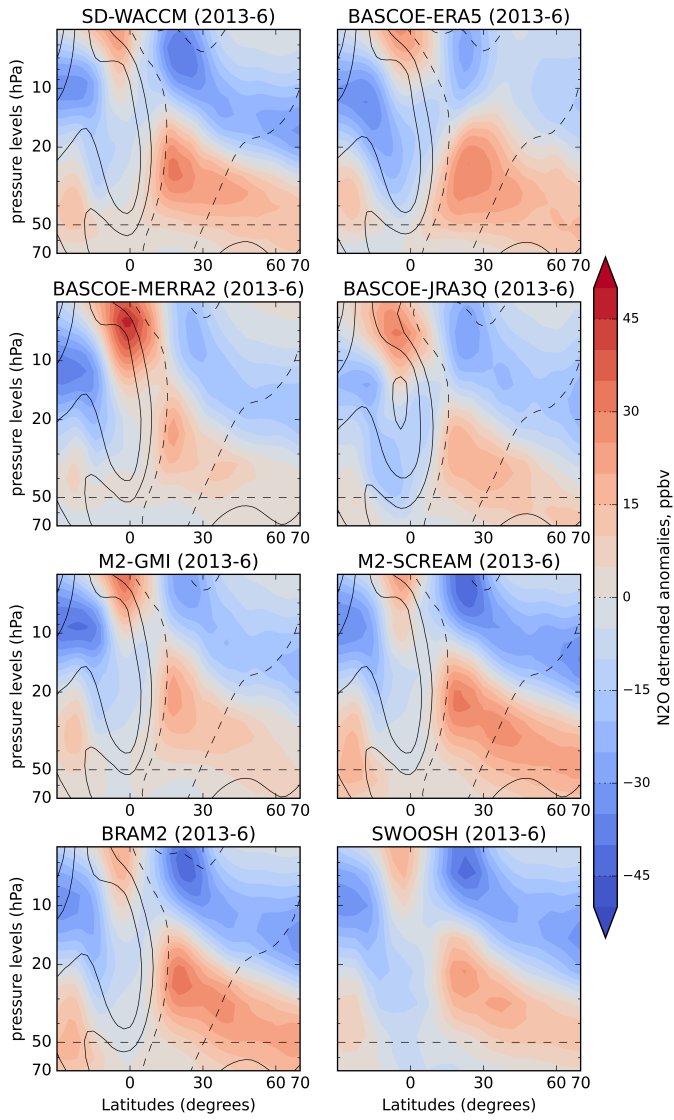

Figure S14: As Fig. 6, but for June 2013.

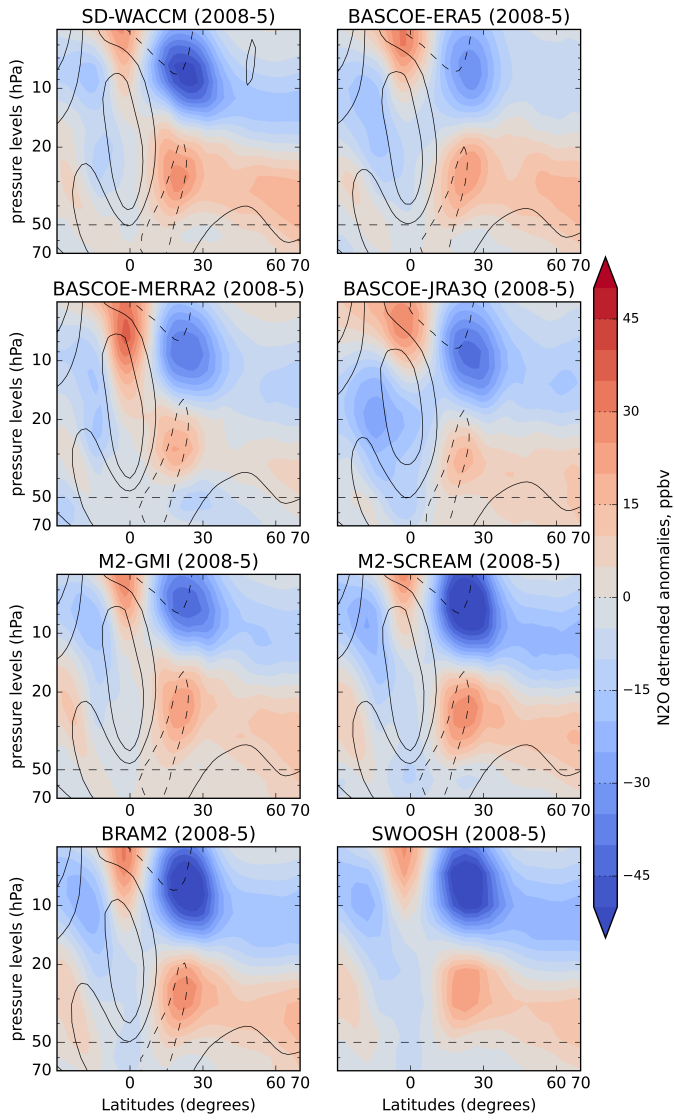

Figure S15: As Fig. 6, but for May 2008.

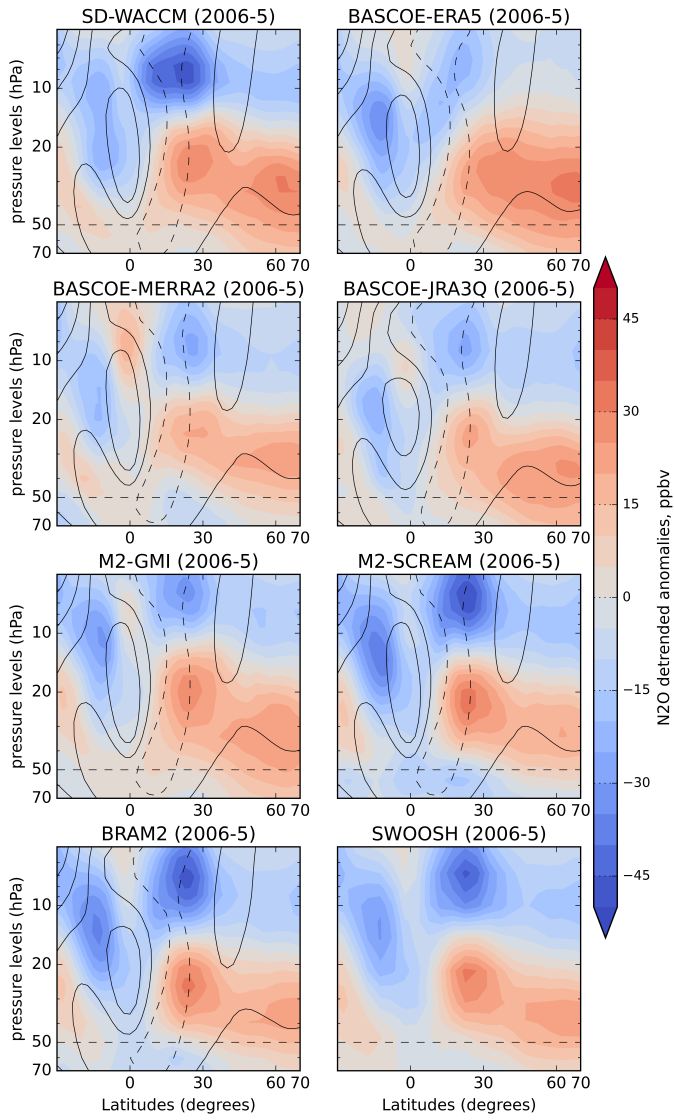

Figure S16: As Fig. 6, but for May 2006.

## 6 Seasonal variations of the zonal wind

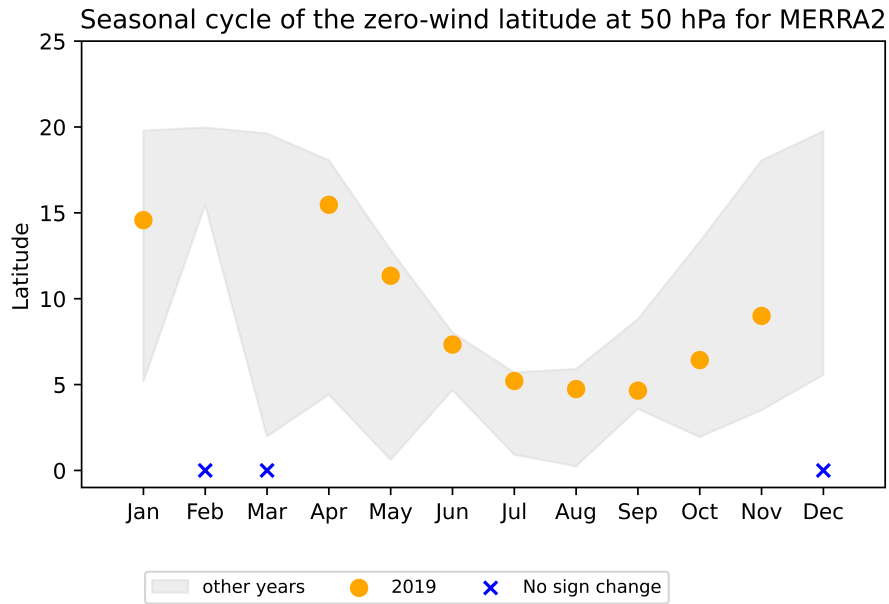

Figure S17: As Fig. 9, but for MERRA2.

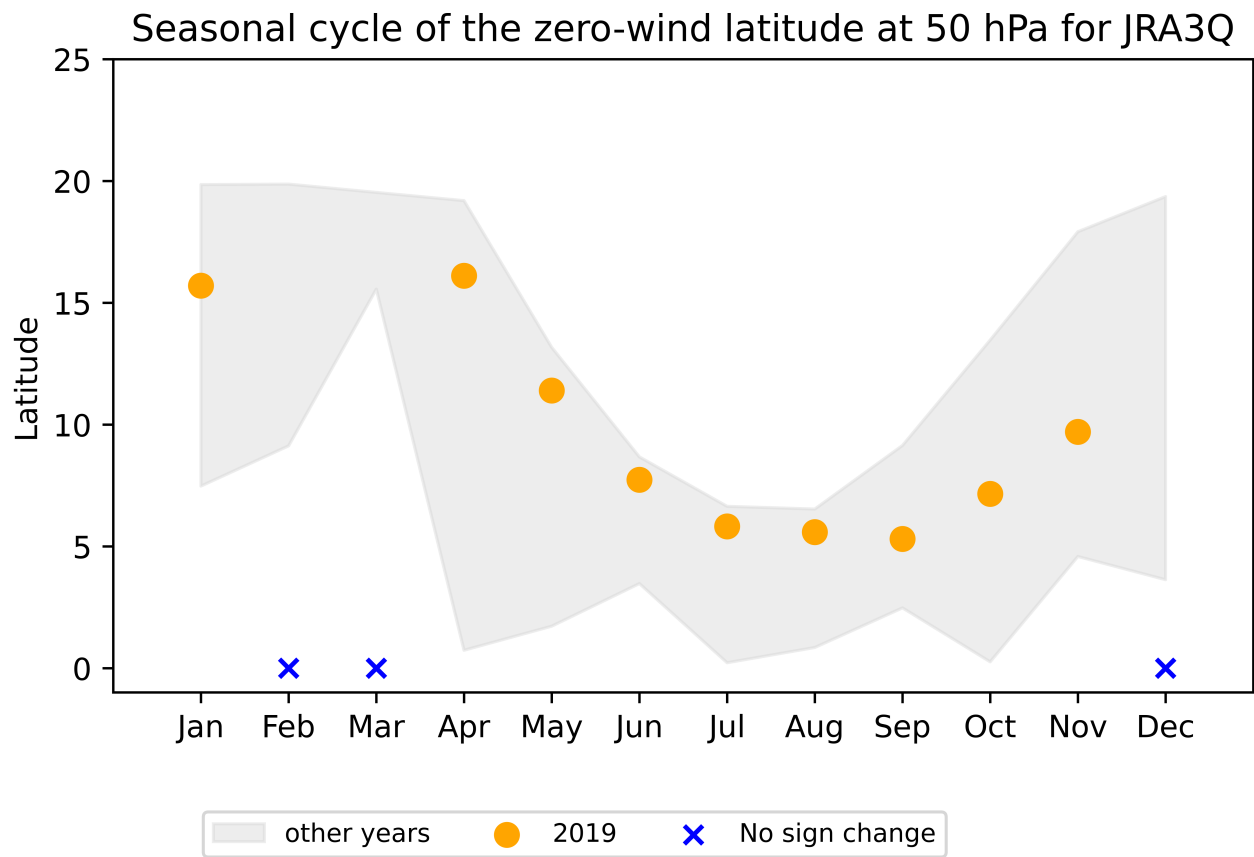

Figure S18: As Fig. 9, but for JRA3Q.

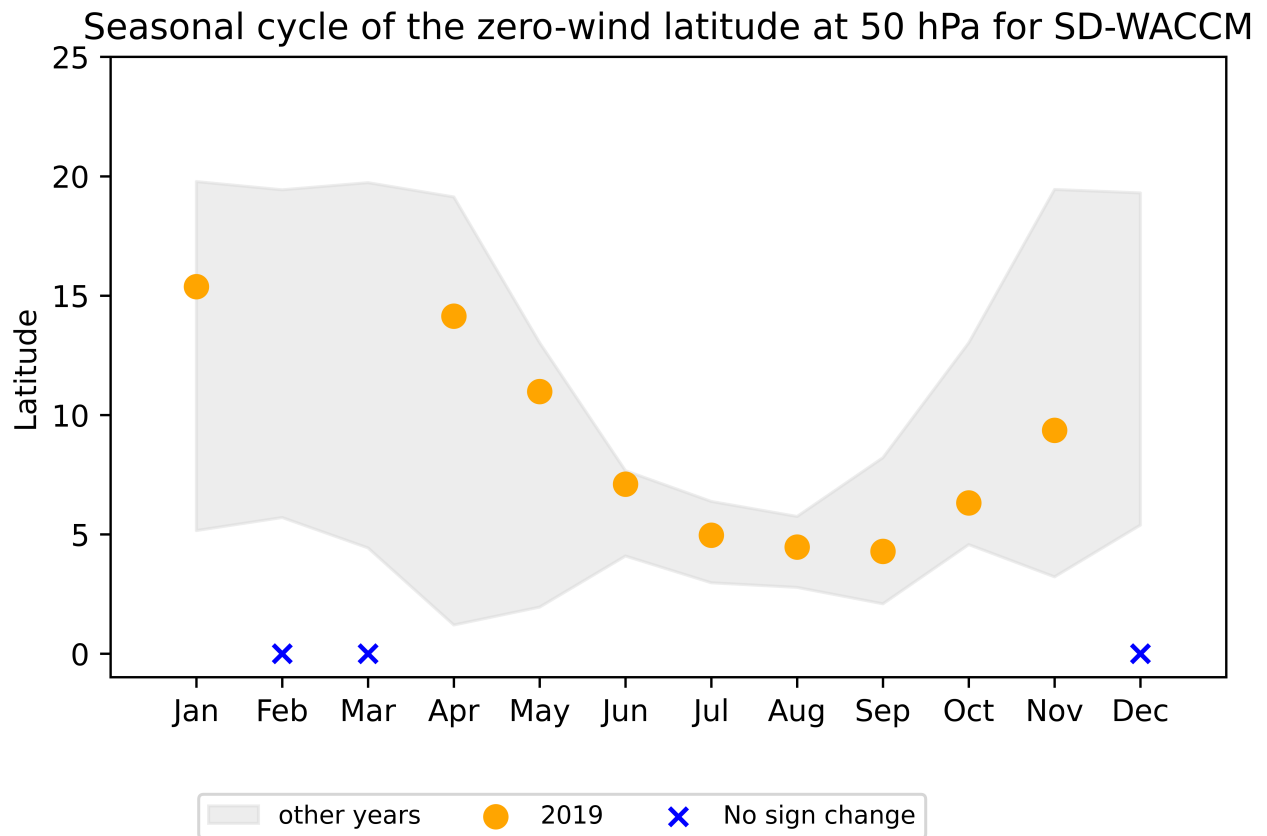

Figure S19: As Fig. 9, but for SD-WACCM.

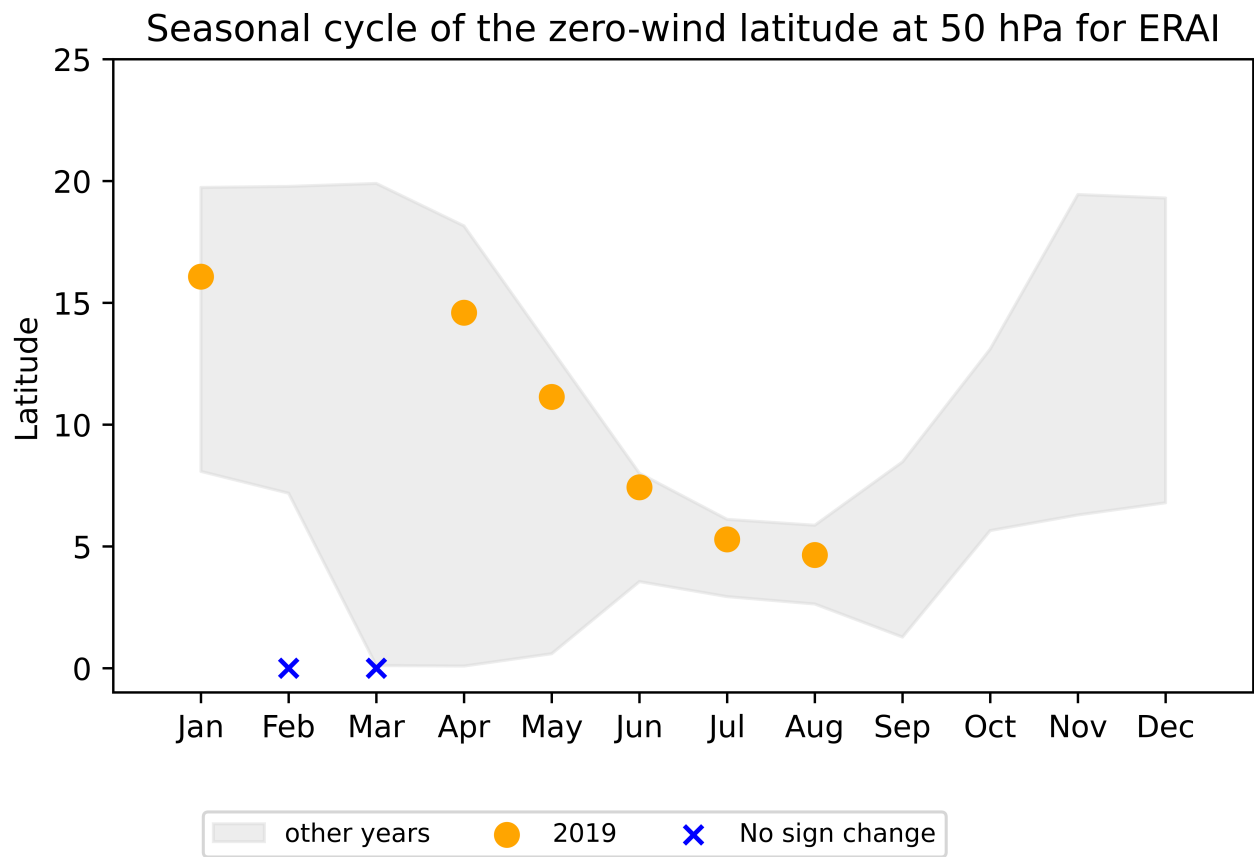

Figure S20: As Fig. 9, but for ERAI.

## 7 Anomalies of meridional component of the horizontal wind

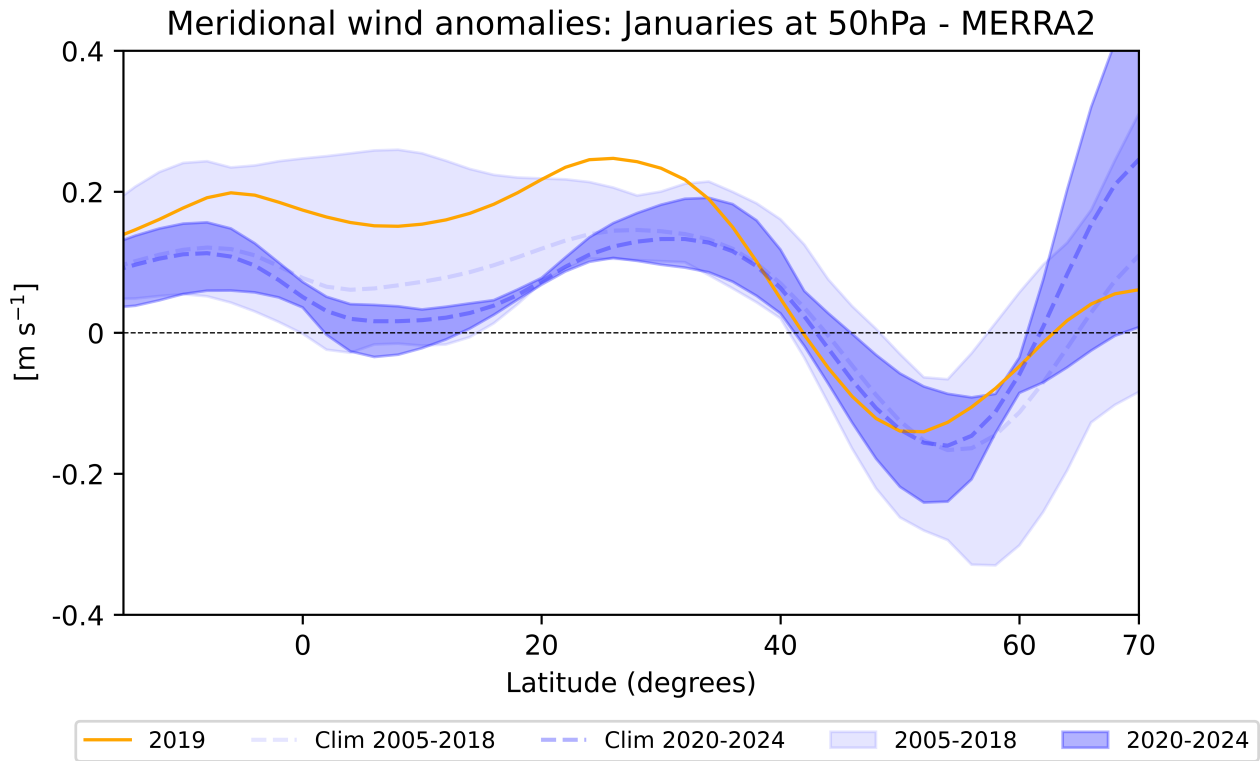

Figure S21: As Fig. 10, but for MERRA2.

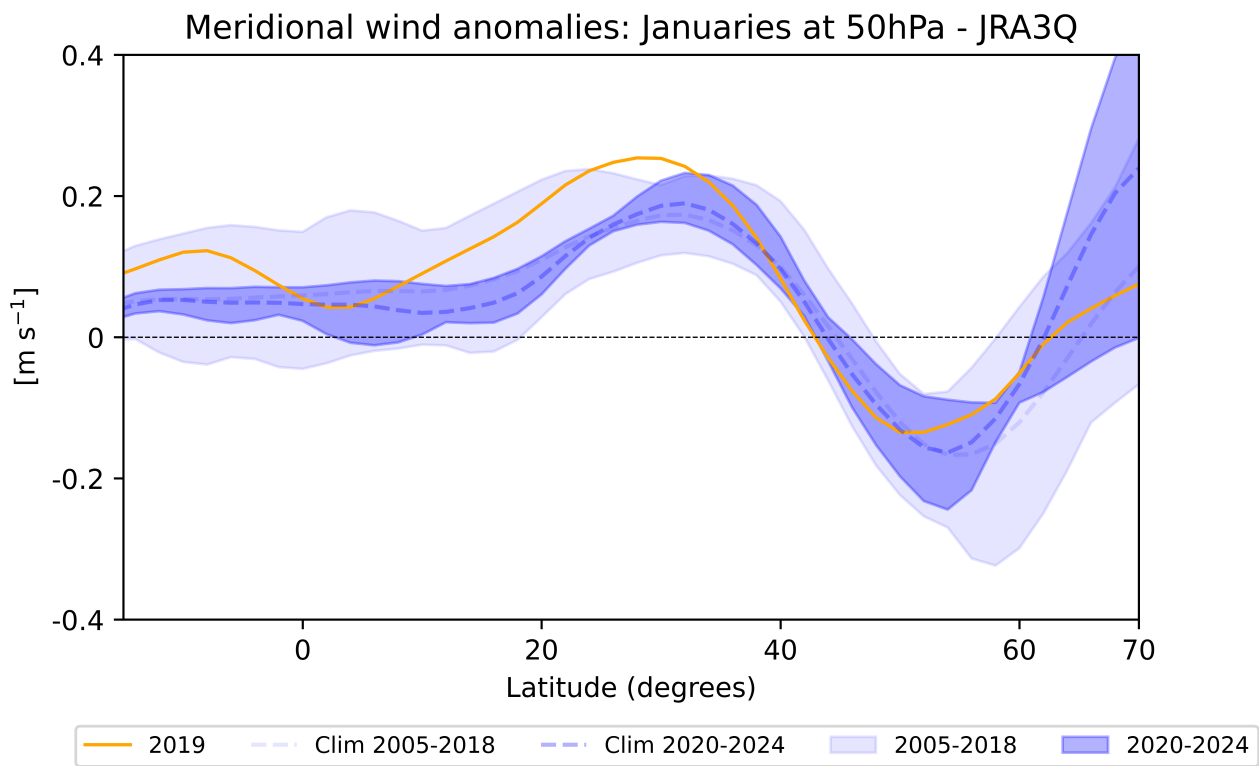

Figure S22: As Fig. 10, but for JRA3Q.

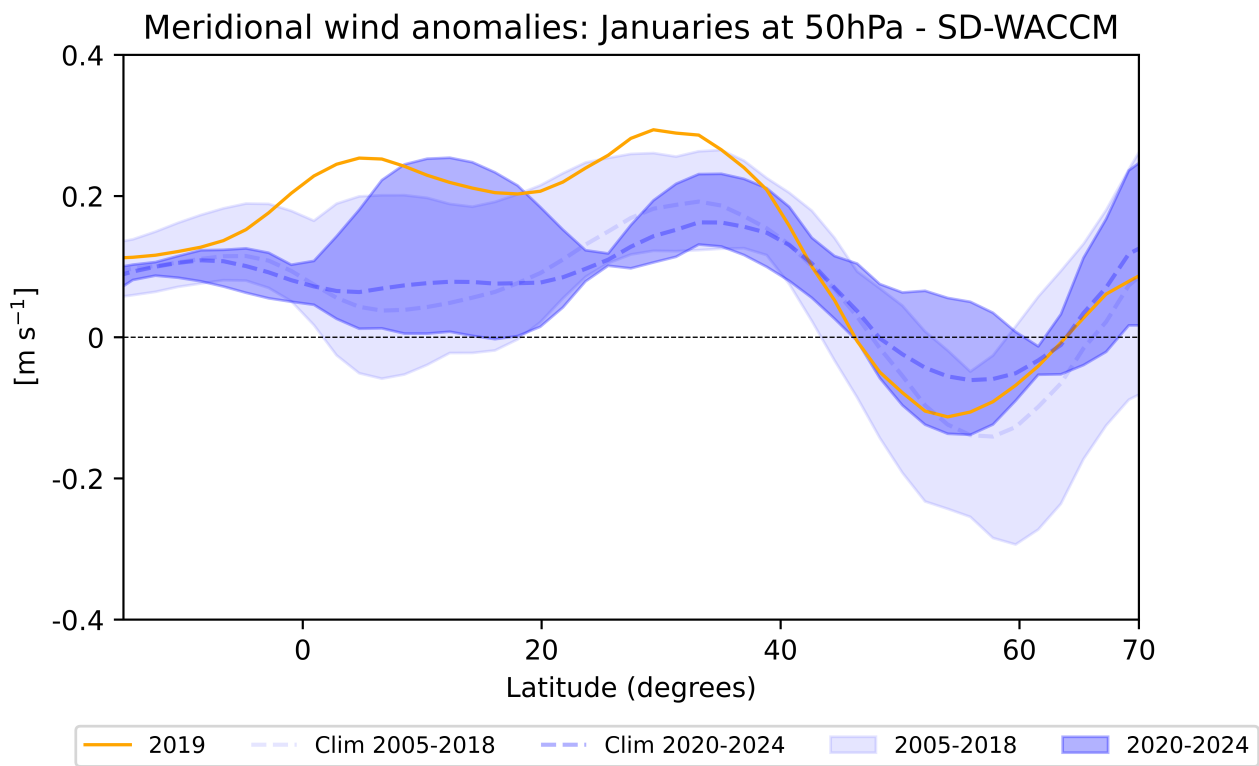

Figure S23: As Fig. 10, but for SD-WACCM.

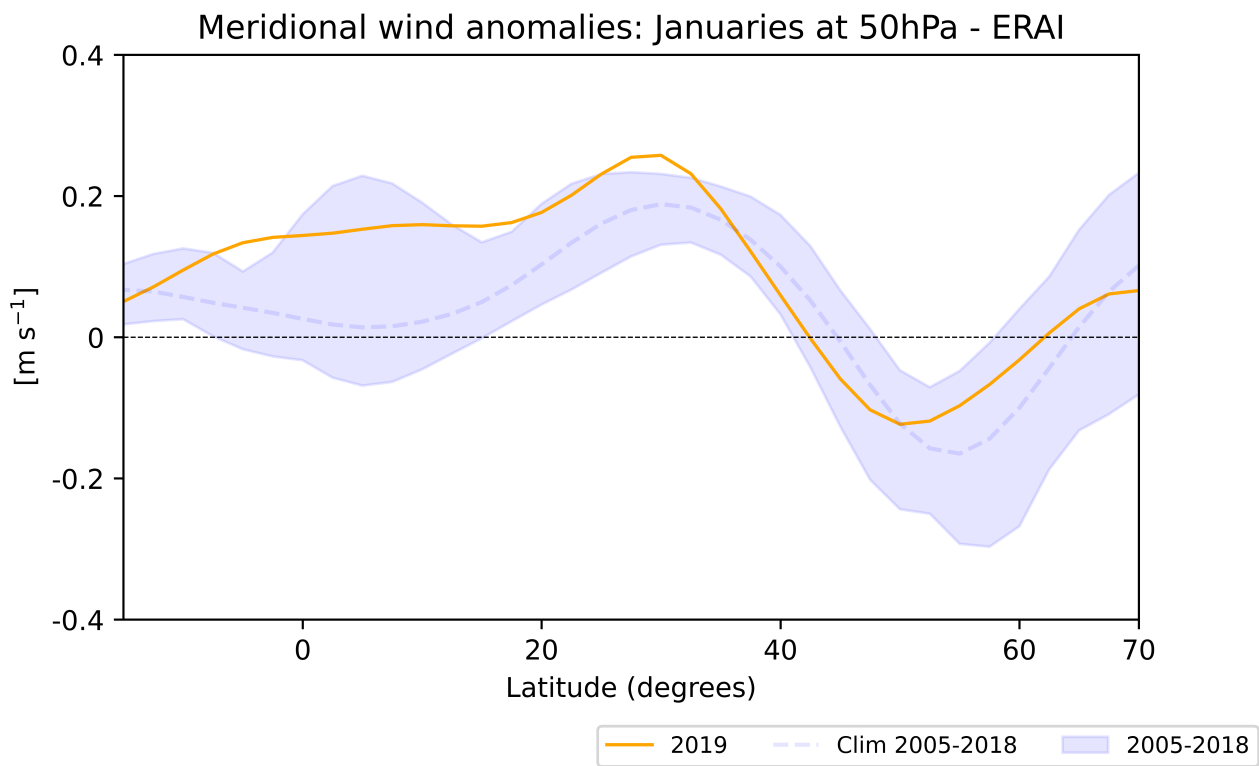

Figure S24: As Fig. 10, but for ERAI.
